# Supplementary material for: Effects of protein interaction data integration, representation and reliability on the use of network properties for drug target prediction
Source: PubMed Central journal article supplement (PMC3534413; doi:10.1186/1471-2105-13-294), 2012-11-12

## **Additional file 2 – Supplementary Figures**

### **Supplementary Figure 1 – DT degree plot.**

The plot highlights the line corresponding to the 95<sup>th</sup> percentile, showing that most DTs have lower degree.

### **Supplementary Figure 2 – Comparative histogram of DTs and non-DTs over a degree rank.**

### **Supplementary Figure 3 - Over-representation of drug targets over a BC ranking of nodes in the full spoke PIN, Binary (B), N-ary (N), Spoke-represented (S), BioGRID and Rual+Stelzl data sets.**

Proteins were grouped into bins according to their BC. The width of each bin represents the number of proteins in that bin while the height (-log of the p-value of the hypergeometric test) represents how over-represented drug targets are in that bin. Each bin contains at least 200 proteins. Over-represented bins (p-value < 0.05) are highlighted in red. Drug targets are over-represented in high-degree bins and some middle-degree bins for the full PIN (a) and the B data set (b), while this trend is largely lost in the N (c), S (d), BioGRID (e) and the Rual-Stelzl (f) data sets.

### **Supplementary Figure 4 – ROC curve for BC as DT predictor (full PIN and reliable subsets).**

Plot of False Positive Rate versus True Positive Rate for a BC rank of the full PIN and five subsets considered as containing higher-confidence interactions: non-predicted interactions include all interactions except those coming from orthologous transfer; LTP includes interactions with an lpr score < 22; MI-IntAct includes interactions with MI-IntAct scores > 0.6; MI-psicquic includes interactions with MI-psicquic scores > 0.7; and B includes the true binary interactions (i.e., potential spoke-represented n-ary data is removed).

### **Supplementary Figure 5 - Over-representation of drug targets along a degree rank and a BC rank for the full PIN with a matrix representation of protein complexes.**

Proteins were grouped into bins according to their degree (a) and their BC (b), for a matrix model of the full PIN. The width of each bin represents the number of proteins in that bin while the height (-log of the p-value of the hypergeometric test) represents how over-represented drug targets are in that bin. Each bin contains at least 200 proteins. Over-represented bins (p-value < 0.05) are highlighted in red. Drug targets are over-represented in high-degree bins and some middle-degree bins, just as in the spoke representation.

### **Supplementary Figure 6 – ROC curve for degree (spoke and matrix), and BC (matrix).**

Plot of False Positive Rate versus True Positive Rate for a degree rank of the full PIN following a spoke and a matrix representation of protein complexes, and a BC rank of the full PIN following a matrix representation of protein complexes.

### **Supplementary Figure 7 - Over-representation of drug targets according to pathway centrality.**

Proteins were grouped into bins according to their pathway centrality. The width of each bin represents

the number of proteins in that bin while the height (-log of the p-value of the hypergeometric test) represents how over-represented drug targets are in that bin. Each bin contains at least 200 proteins. Over-represented bins (p-value < 0.05) are highlighted in red. Drug targets are highly over-represented in all pathway centrality bins greater than zero and are not over-represented in proteins outside the pathway databases (pathway centrality = 0 – not shown). This observation is valid for all databases: PID (a), Reactome (b) and KEGG (c). A positive correlation occurs between increasing pathway centrality and over-representation only for the PID database.

**Supplementary Figure 8 – ROC curve for pathway centrality over different pathway databases.** Plot of False Positive Rate versus True Positive Rate for a pathway centrality rank of the Reactome, PID and KEGG pathway databases.

#protos

0 20 40 60 80 100 120 140

0

200

400

600

800

degree

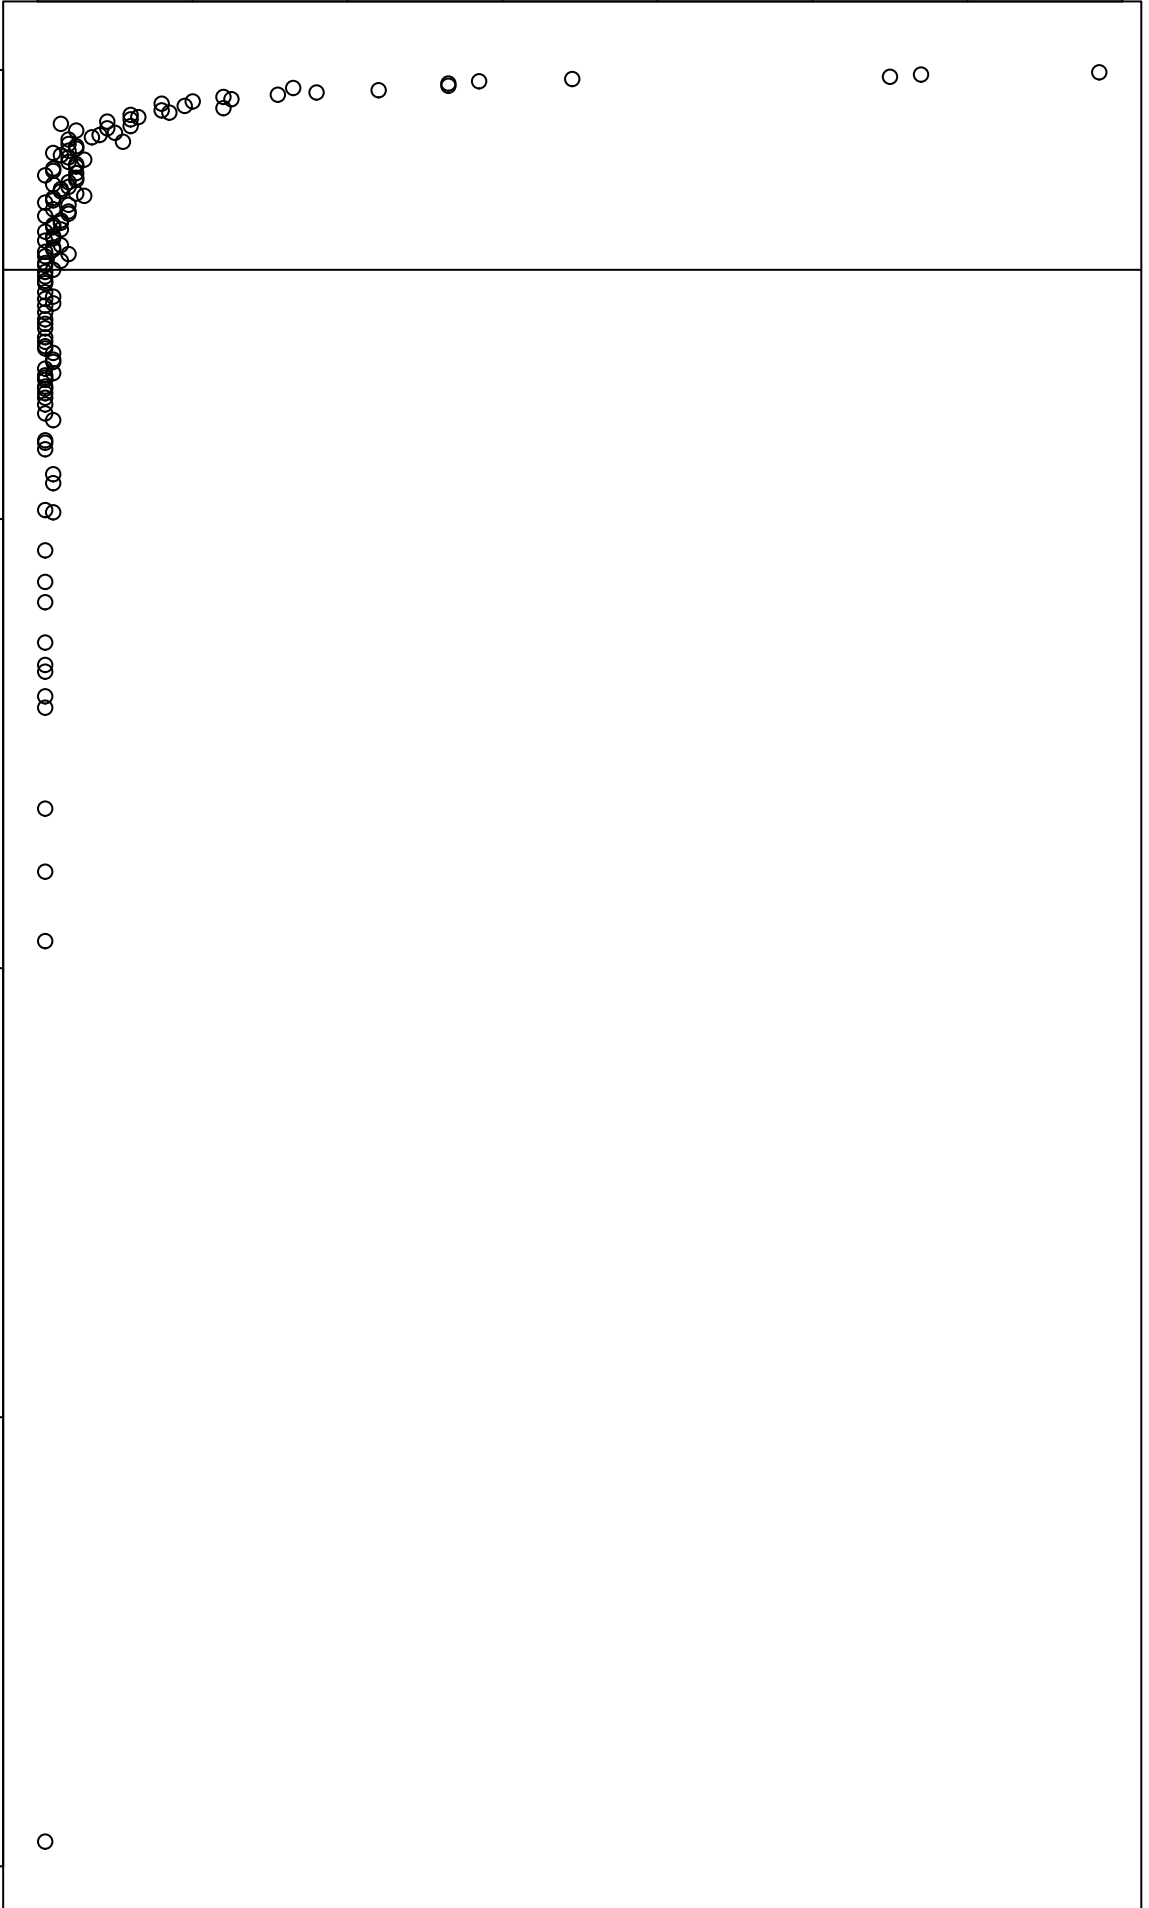

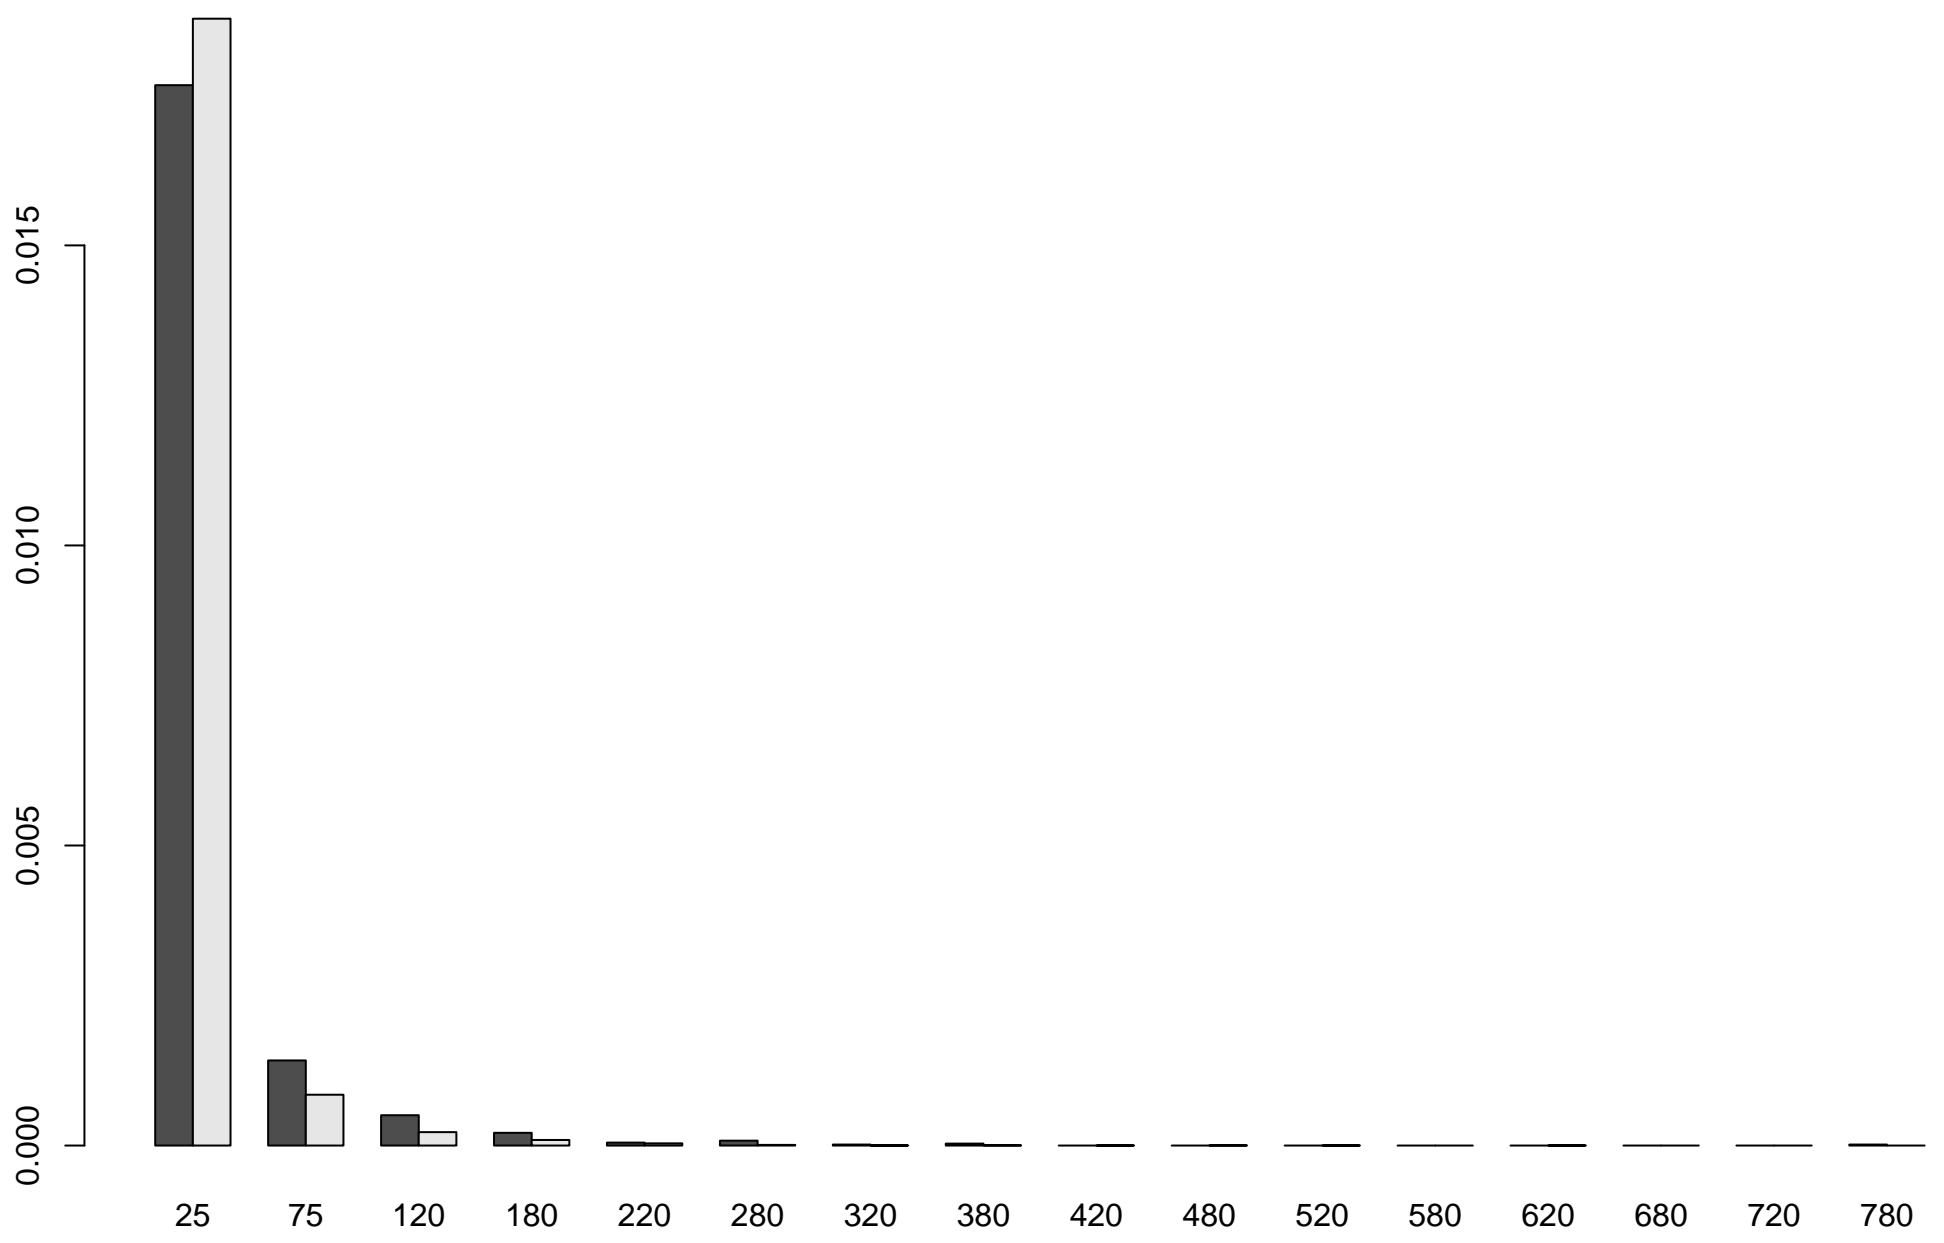

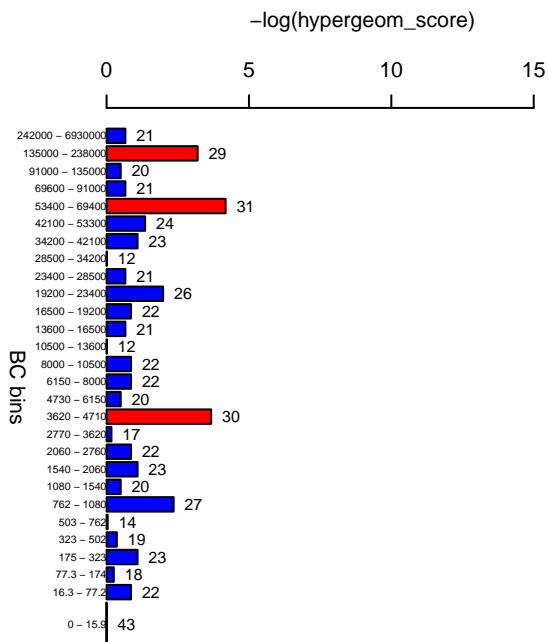

(d)

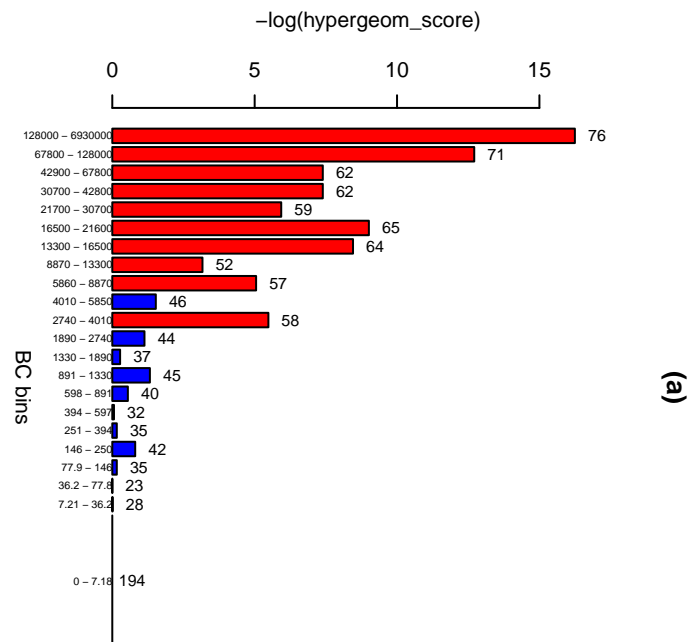

(a)

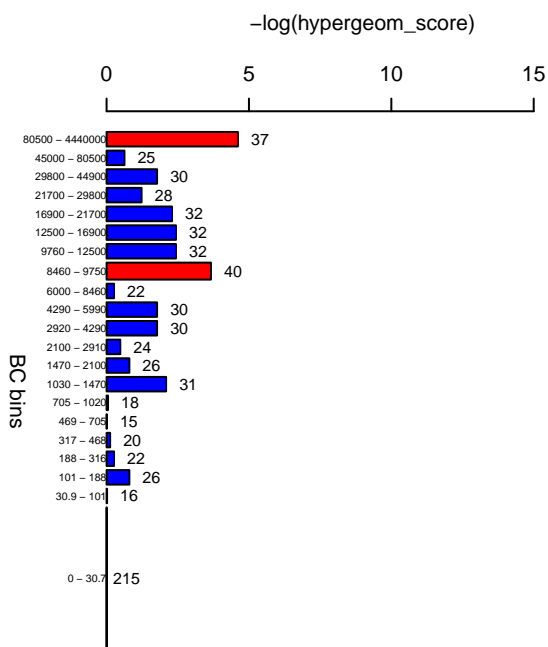

(e)

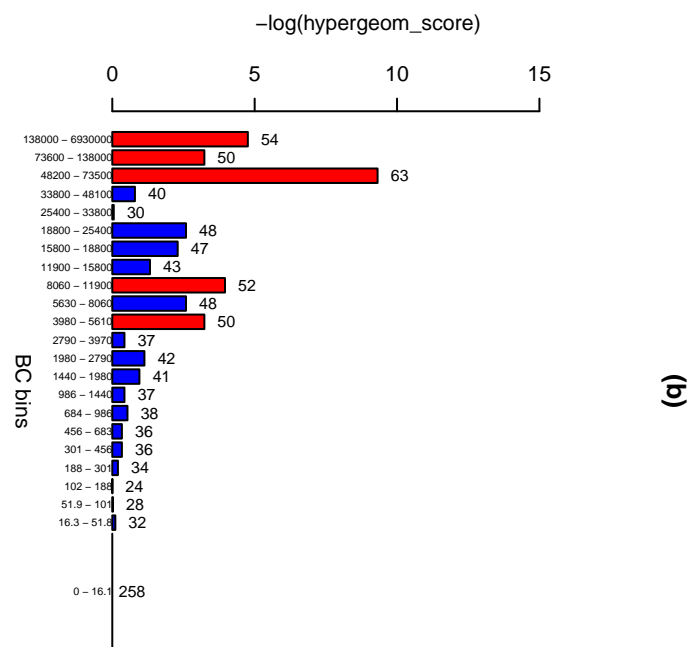

(b)

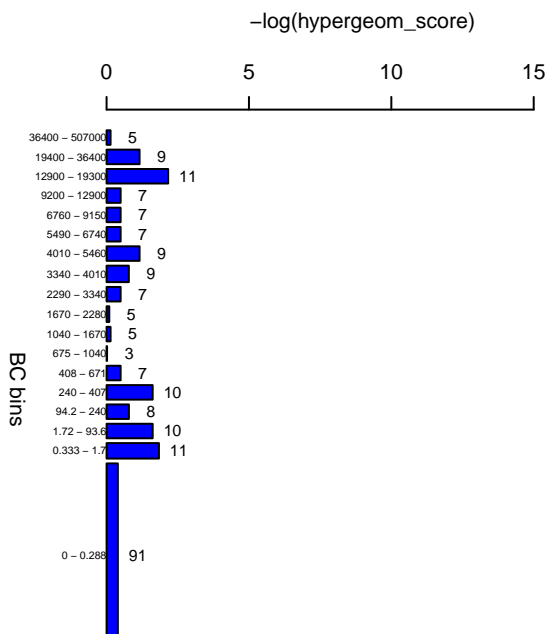

(f)

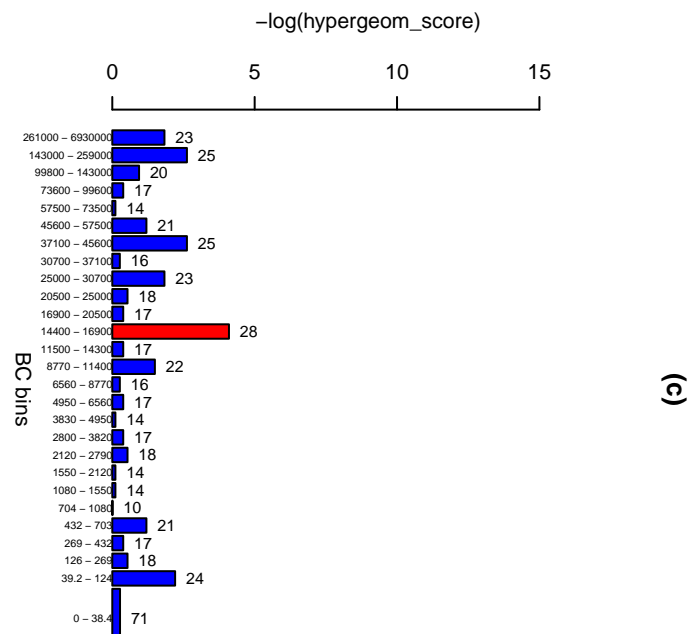

(c)

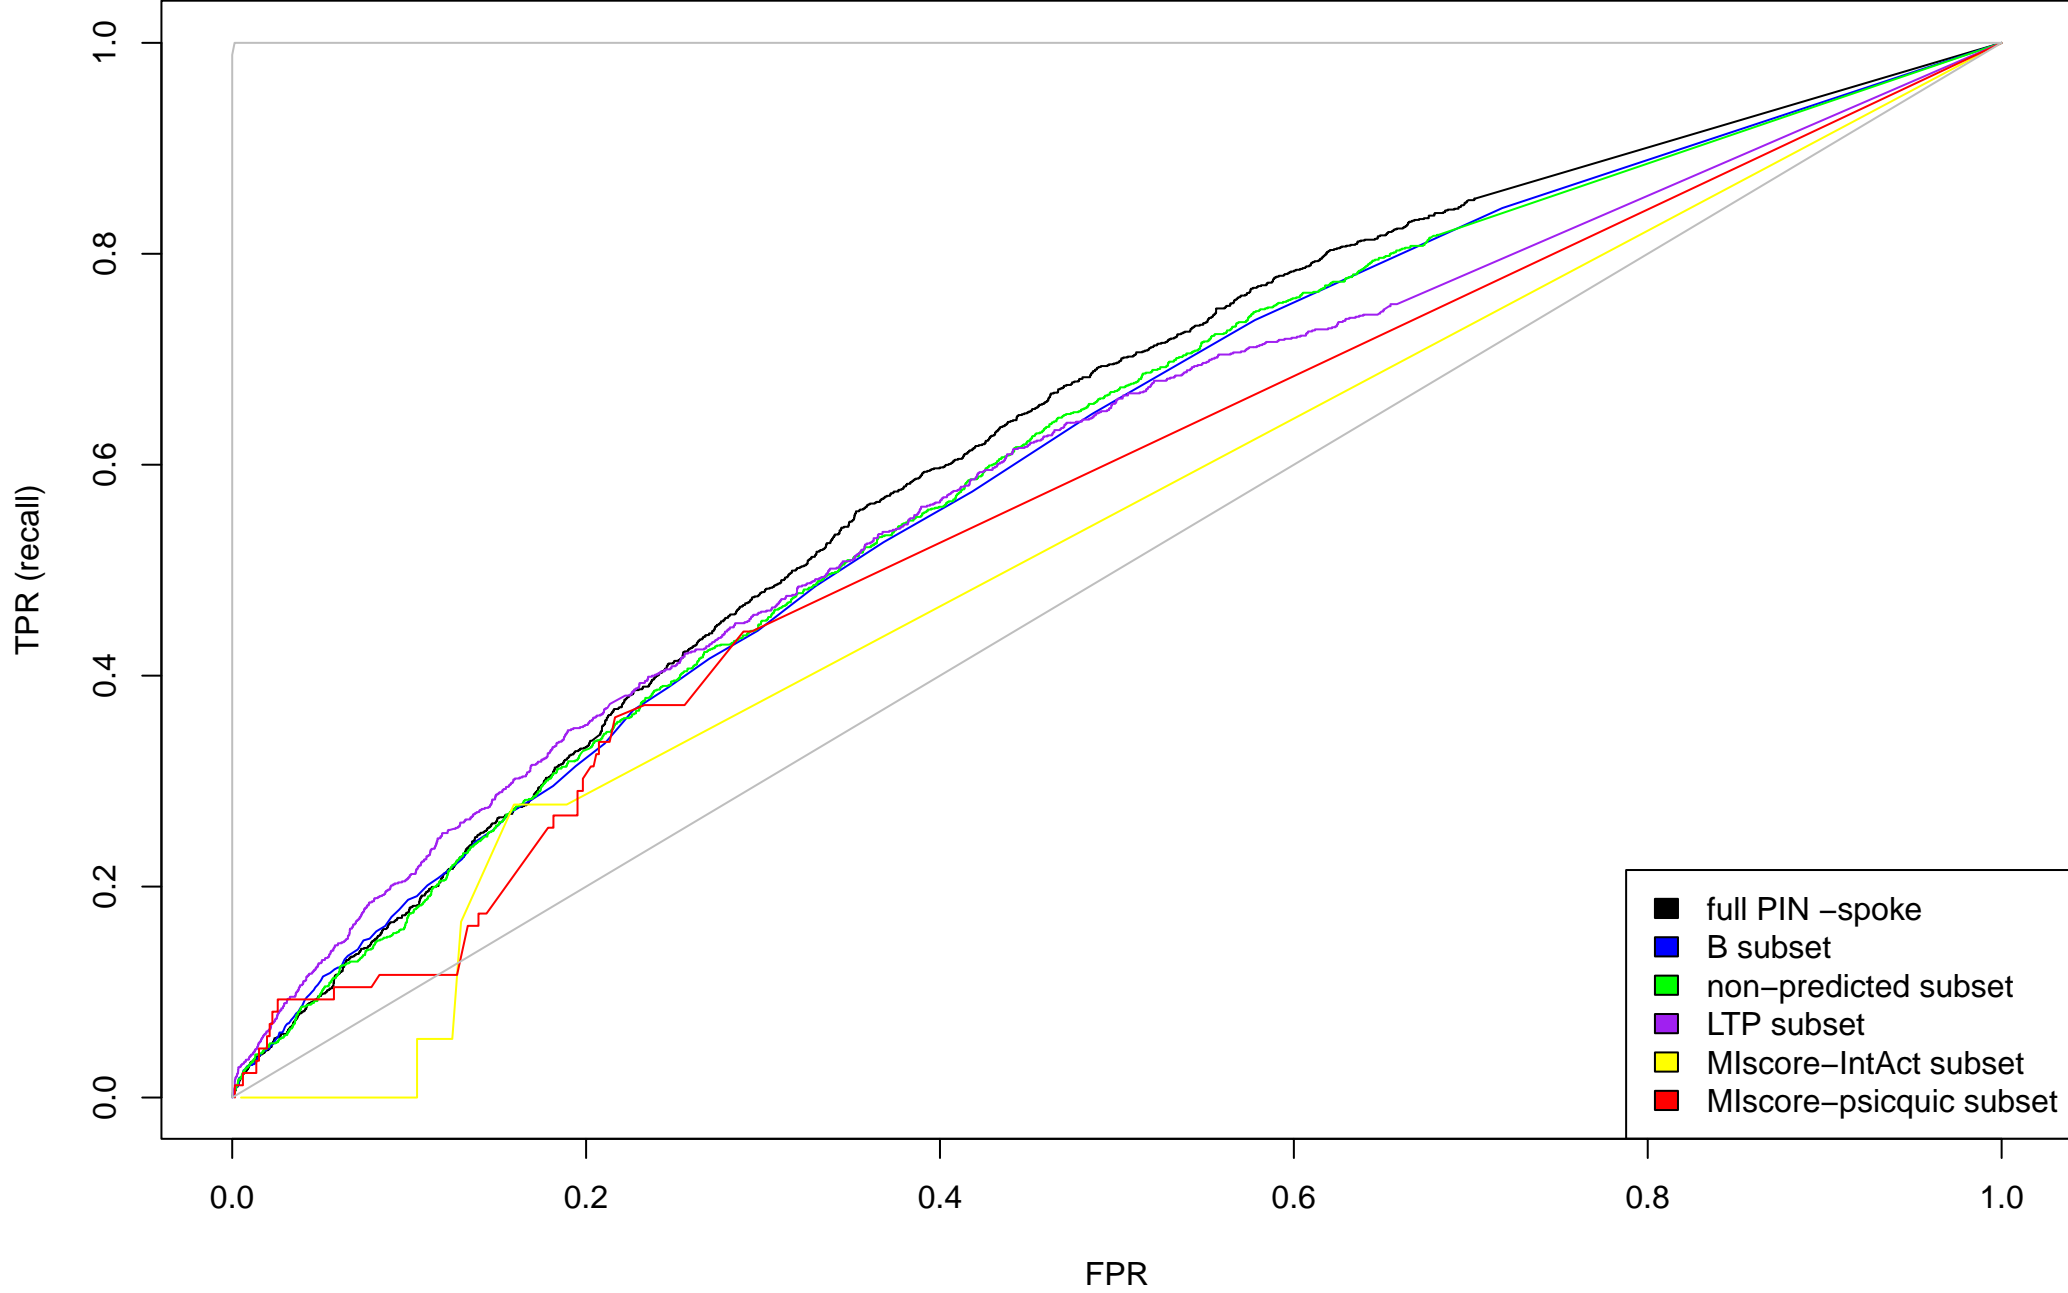

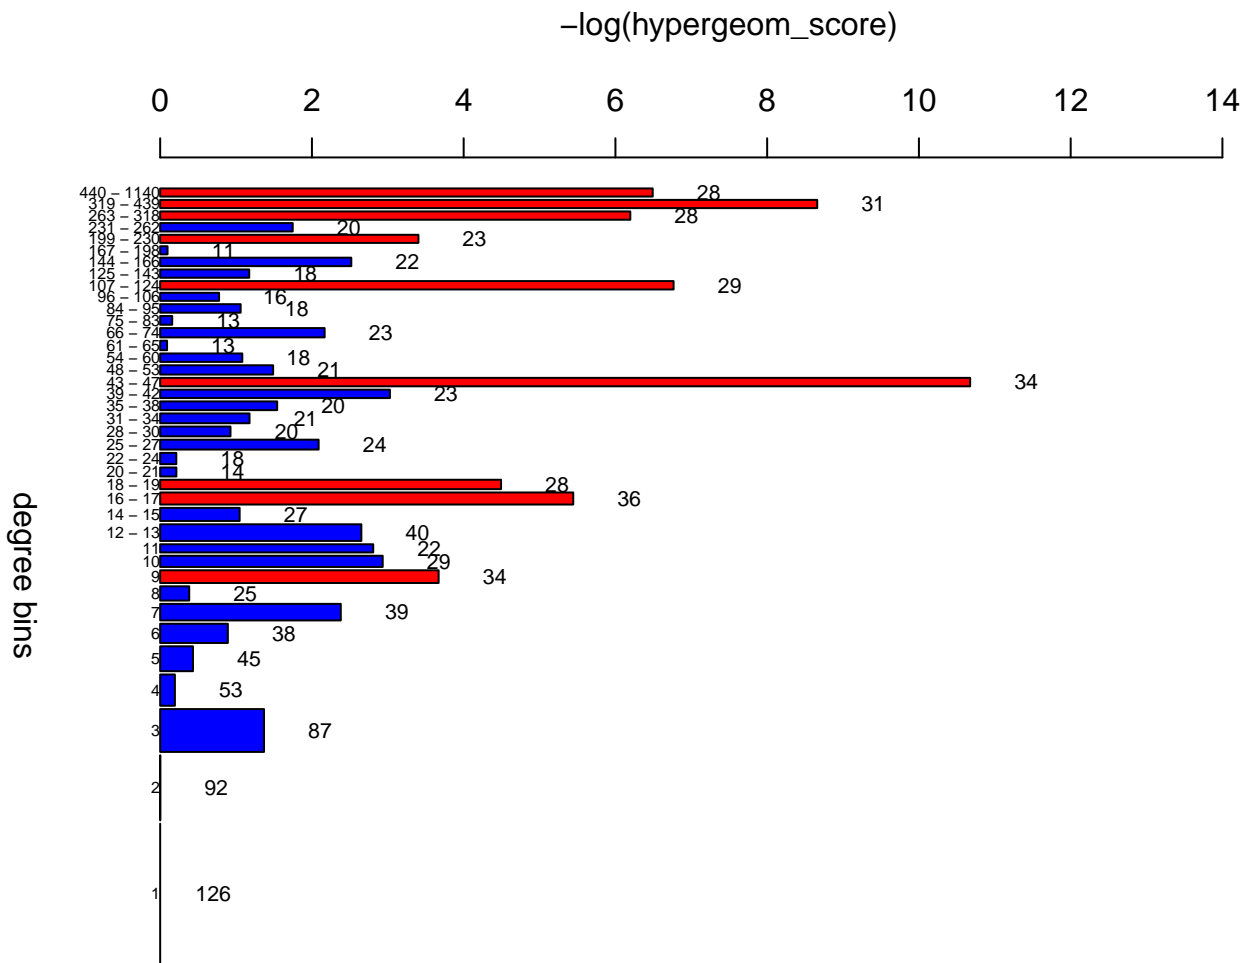

(a)

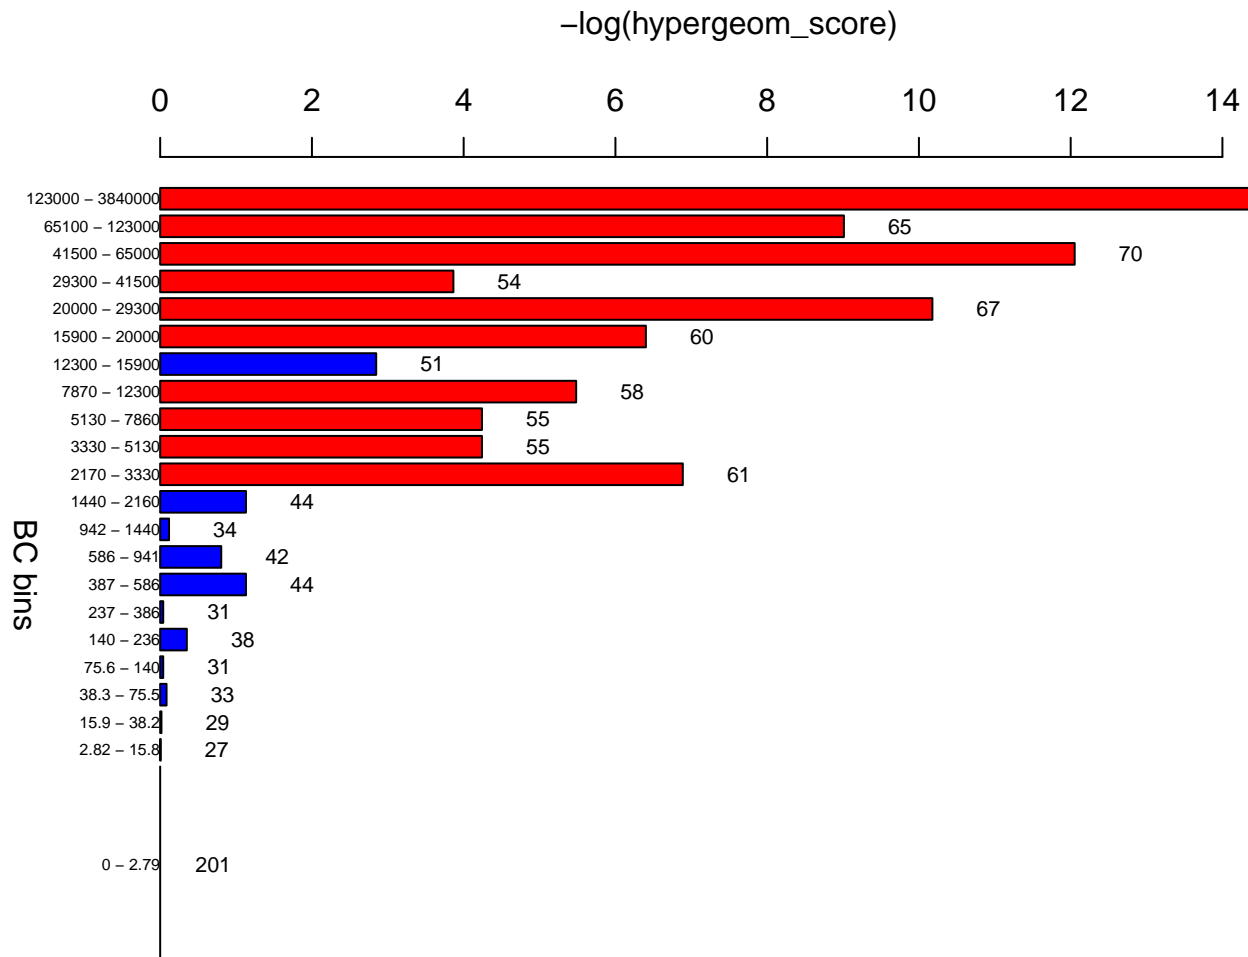

(b)

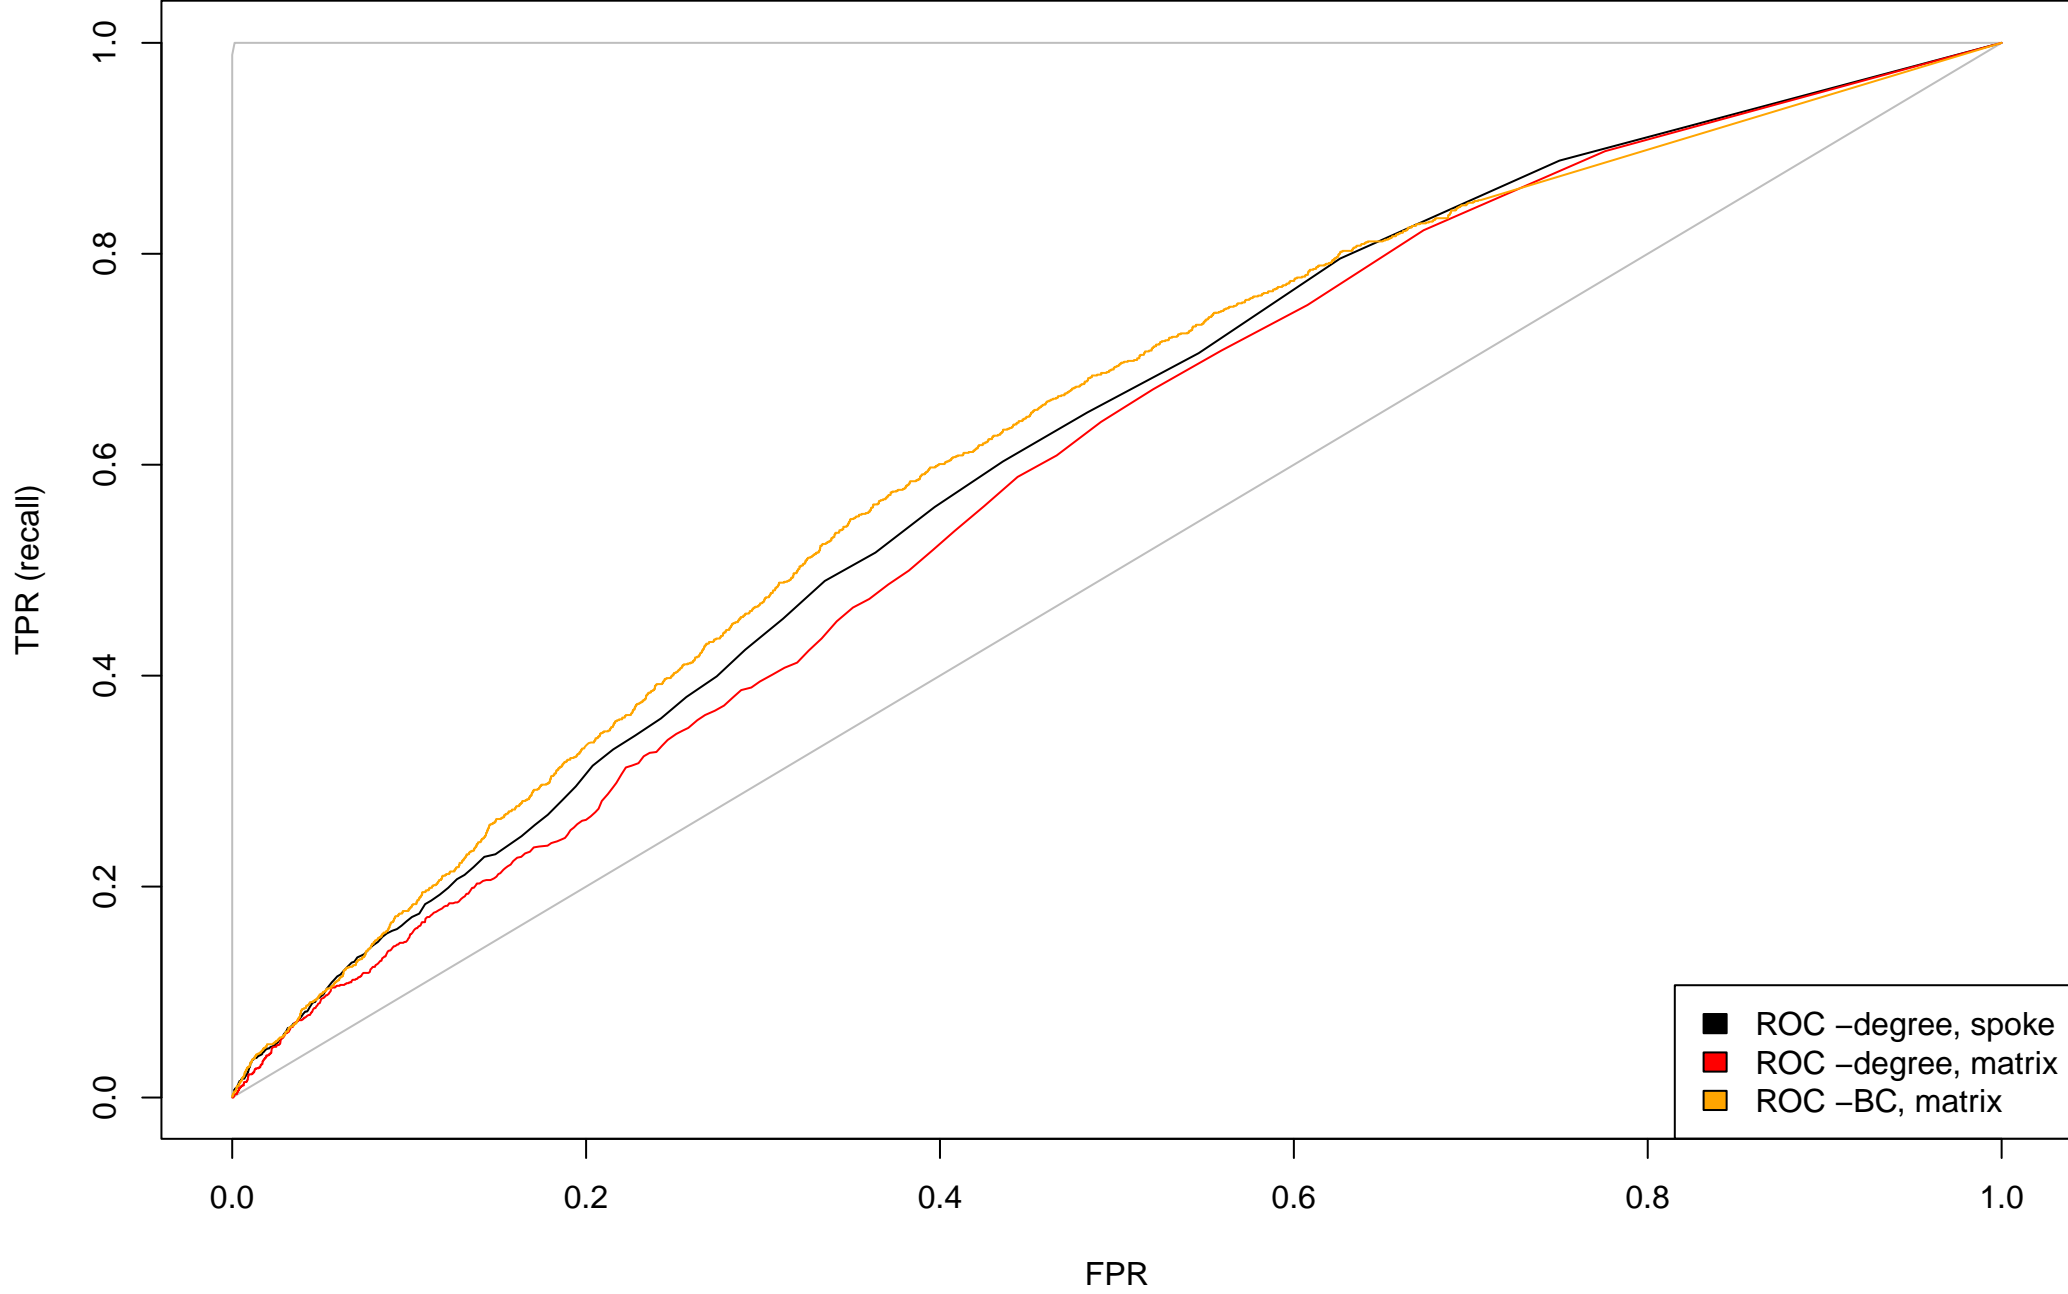



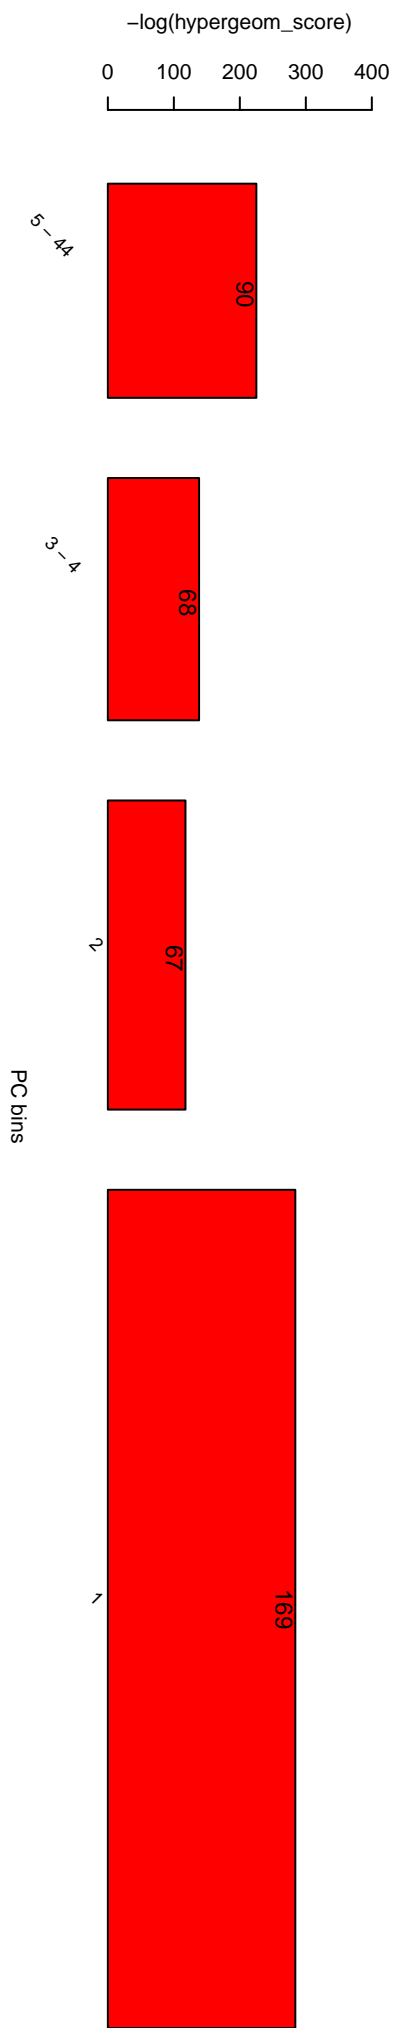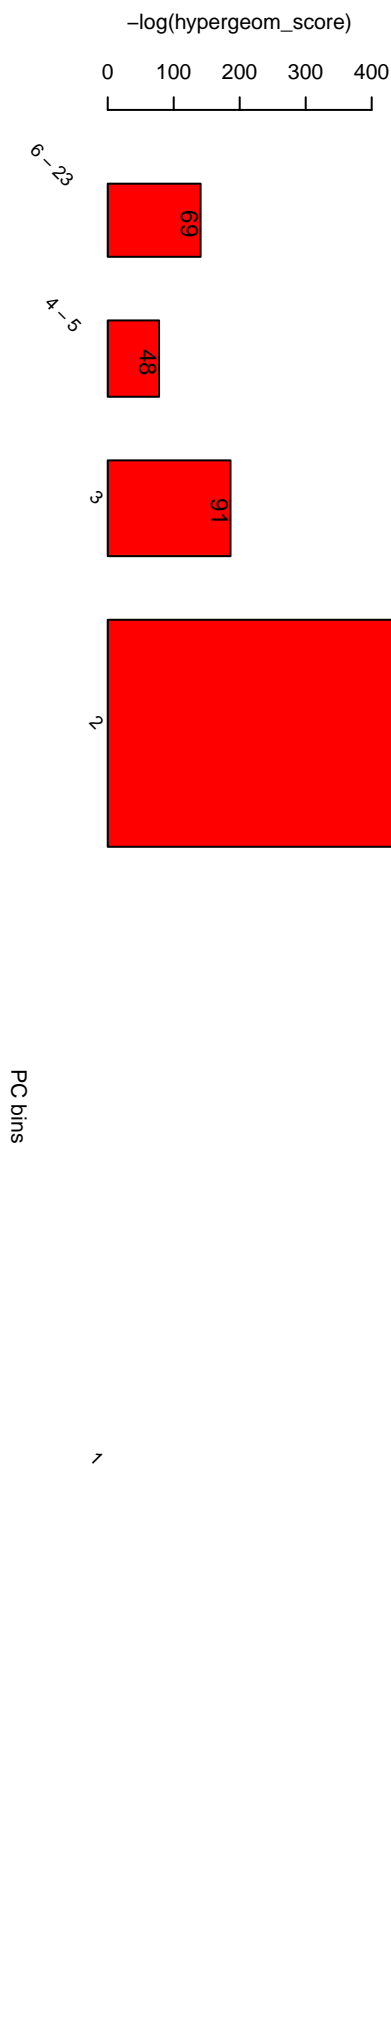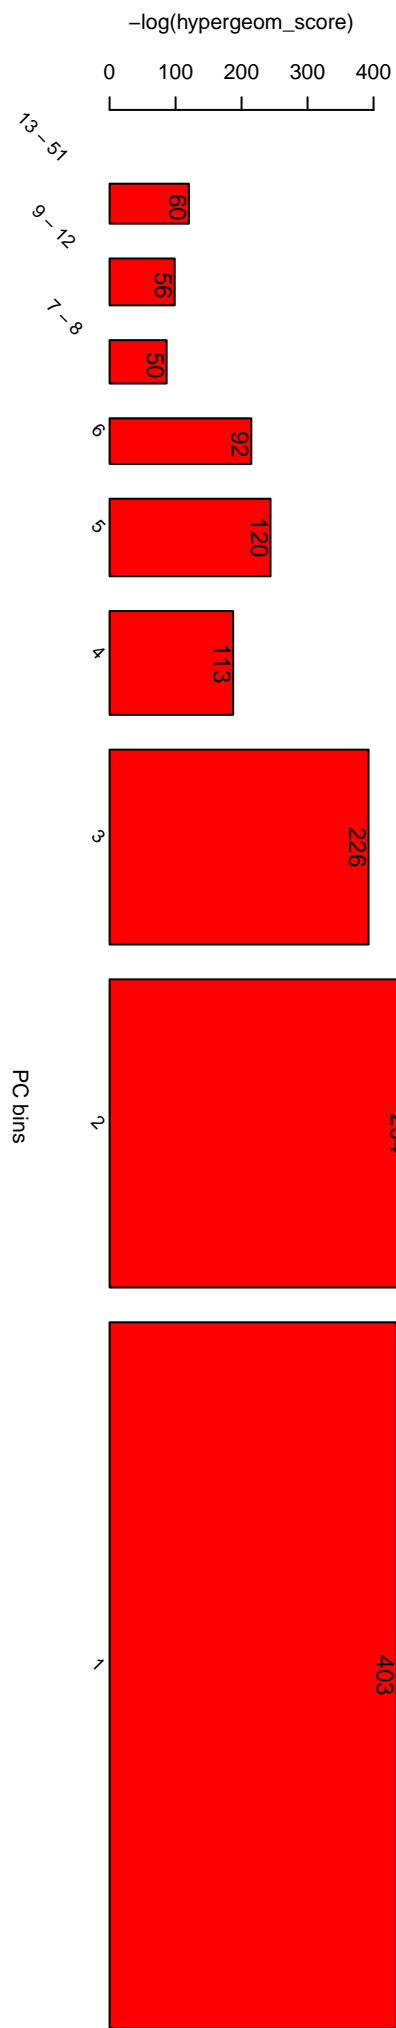

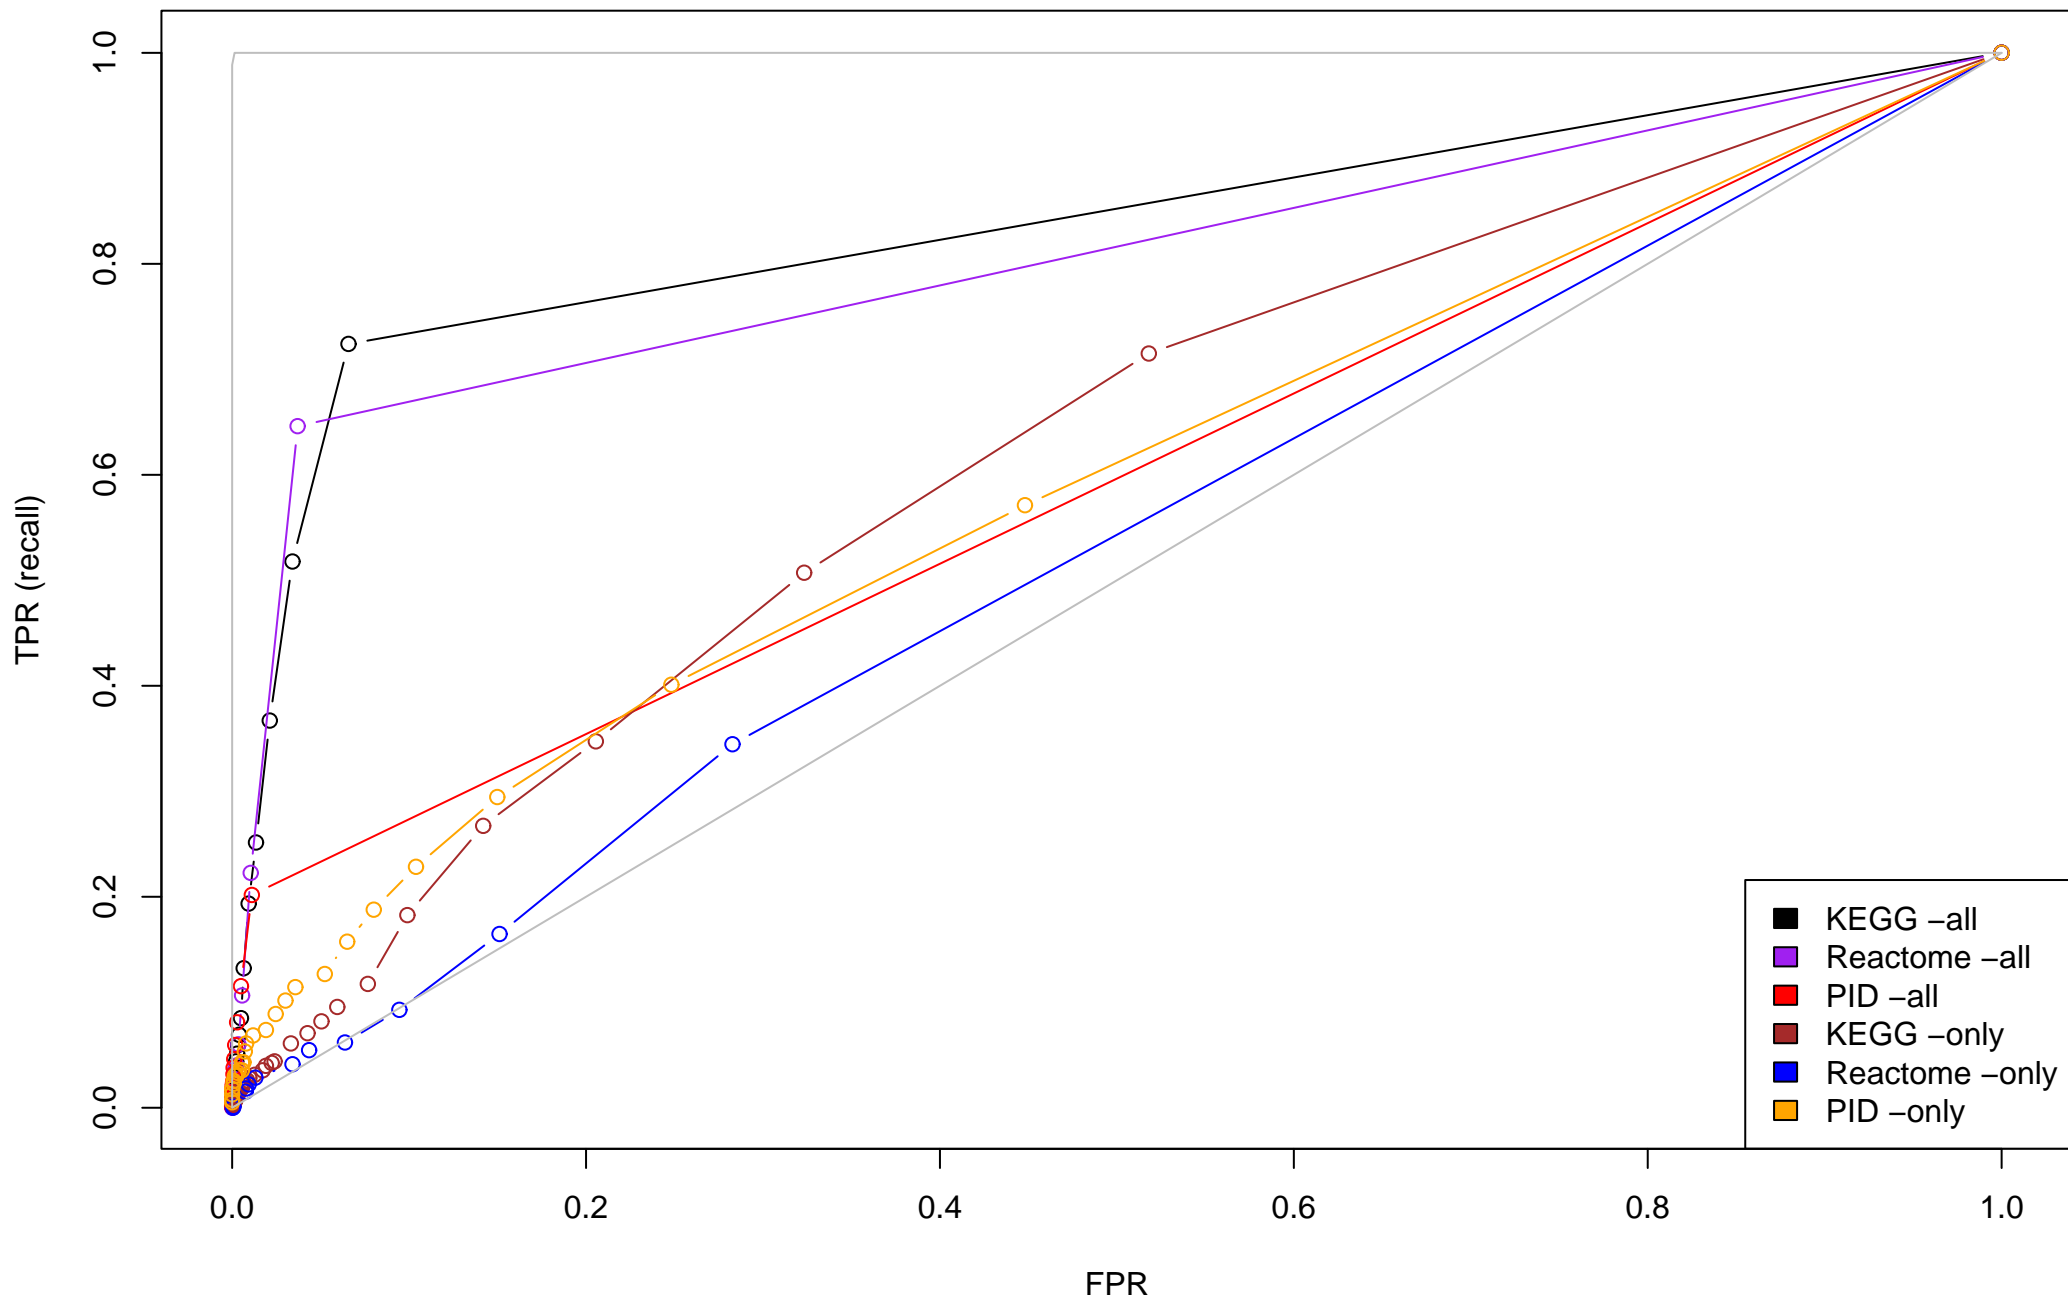

Supplement: 1471-2105-13-294-S2.pdf [file 1471-2105-13-294-S2.pdf]
