# Supplementary material for: Effects of protein interaction data integration, representation and reliability on the use of network properties for drug target prediction
Source: PubMed Central journal article supplement (PMC3534413; doi:10.1186/1471-2105-13-294), 2012-11-12
Supplement: 1471-2105-13-294-S3.pdf [file 1471-2105-13-294-S3.pdf]

## Additional file 3 - Supplementary Tables

**Supplementary Table 1 - Connected component distribution of the full spoke human PIN.**

|                        |    |    |    |   |   |   |    |       |
|------------------------|----|----|----|---|---|---|----|-------|
| # Members in component | 1  | 2  | 3  | 4 | 5 | 8 | 27 | 15754 |
| # Components           | 23 | 88 | 20 | 3 | 2 | 2 | 1  | 1     |

There is one giant component and several smaller components in the full spoke human PIN. The components with one member only correspond to proteins that only have polymeric interactions in iRefIndex, and include metabolic enzymes such as F264, pore-forming ion channels such as CALHM1, structural components of the eye lens as CRGD, and collagen-alpha-1 proteins, involved in cell binding.

**Supplementary Table 2 – Degree of all proteins and DTs after the spoke and matrix representation of protein complexes.**

| PIN                      | avg degree | sd     | max degree |
|--------------------------|------------|--------|------------|
| Full graph –spoke        | 14.16      | 29.01  | 789        |
| DT in full graph –spoke  | 22.48      | 44.94  | 789        |
| Full graph –matrix       | 42.86      | 93.49  | 1145       |
| DT in full graph -matrix | 61.69      | 115.51 | 889        |

**Supplementary Table 3 – Over-representation analysis of GADB disease classes in high-degree bins.**

| Bin ID | Valid DAVID IDs (out of 700 in each bin) | GADB Disease Class | Number of Proteins | P-values < 0.1 |
|--------|------------------------------------------|--------------------|--------------------|----------------|
| Bin 1  | 622                                      | CANCER             | 94                 | 2.68E-13       |
|        |                                          | AGING              | 17                 | 0.0009         |
|        |                                          | OTHER              | 60                 | 0.0265         |
|        |                                          | NEUROLOGICAL       | 47                 | 0.0356         |
|        |                                          | PHARMACOGENOMIC    | 28                 | 0.0757         |
| Bin 2  | 633                                      | CANCER             | 75                 | 2.53E-08       |
| Bin 3  | 620                                      | CANCER             | 57                 | 0.0040         |
|        |                                          | AGING              | 11                 | 0.0594         |
| Bin 4  | 634                                      | CANCER             | 55                 | 0.0108         |
|        |                                          | UNKNOWN            | 20                 | 0.0351         |
|        |                                          | VISION             | 16                 | 0.0653         |
|        |                                          | OTHER              | 49                 | 0.0872         |

|        |     |                 |    |        |
|--------|-----|-----------------|----|--------|
|        |     | REPRODUCTION    | 19 | 0.0995 |
| Bin 5  | 632 | UNKNOWN         | 22 | 0.0152 |
|        |     | OTHER           | 55 | 0.0187 |
|        |     | CANCER          | 55 | 0.0258 |
|        |     | REPRODUCTION    | 22 | 0.0287 |
|        |     | HEMATOLOGICAL   | 14 | 0.0510 |
|        |     | RENAL           | 16 | 0.0623 |
|        |     | DEVELOPMENTAL   | 21 | 0.0663 |
|        |     | CARDIOVASCULAR  | 47 | 0.0665 |
|        |     | INFECTION       | 23 | 0.0986 |
| Bin 6  | 634 | CARDIOVASCULAR  | 50 | 0.0078 |
|        |     | IMMUNE          | 56 | 0.0115 |
|        |     | OTHER           | 52 | 0.0257 |
|        |     | UNKNOWN         | 19 | 0.0591 |
|        |     | INFECTION       | 23 | 0.0648 |
|        |     | NEUROLOGICAL    | 39 | 0.0730 |
| Bin 7  | 637 | CARDIOVASCULAR  | 53 | 0.0011 |
|        |     | IMMUNE          | 56 | 0.0087 |
|        |     | METABOLIC       | 57 | 0.0158 |
|        |     | UNKNOWN         | 20 | 0.0296 |
|        |     | VISION          | 16 | 0.0571 |
|        |     | CHEMDEPENDENCY  | 15 | 0.0611 |
|        |     | OTHER           | 49 | 0.0660 |
| Bin 8  | 645 | NEUROLOGICAL    | 46 | 0.0012 |
|        |     | PHARMACOGENOMIC | 27 | 0.0137 |
|        |     | PSYCH           | 40 | 0.0174 |
|        |     | NORMALVARIATION | 23 | 0.0426 |
|        |     | INFECTION       | 23 | 0.0484 |
|        |     | UNKNOWN         | 18 | 0.0791 |
|        |     | CARDIOVASCULAR  | 43 | 0.0885 |
|        |     | OTHER           | 47 | 0.0986 |
| Bin 9  | 639 | -               | -  | -      |
| Bin 10 | 635 | -               | -  | -      |
| Bin 11 | 645 | REPRODUCTION    | 20 | 0.0180 |
|        |     | UNKNOWN         | 18 | 0.0377 |
|        |     | IMMUNE          | 47 | 0.0490 |
|        |     | NORMALVARIATION | 21 | 0.0521 |
|        |     | INFECTION       | 21 | 0.0585 |

|        |     |                 |    |        |
|--------|-----|-----------------|----|--------|
|        |     | PHARMACOGENOMIC | 22 | 0.0772 |
| Bin 12 | 644 | METABOLIC       | 48 | 0.0511 |
| Bin 13 | 622 | OTHER           | 42 | 0.0134 |
| Bin 14 | 611 | CHEMDEPENDENCY  | 14 | 0.0324 |
|        |     | RENAL           | 13 | 0.0773 |
| Bin 15 | 617 | NORMALVARIATION | 21 | 0.0044 |
| Bin 16 | 610 | -               | -  | -      |
| Bin 17 | 611 | -               | -  | -      |
| Bin 18 | 590 | NORMALVARIATION | 18 | 0.0045 |
|        |     | DEVELOPMENTAL   | 15 | 0.0149 |
| Bin 19 | 573 | HEMATOLOGICAL   | 9  | 0.0290 |
|        |     | NEUROLOGICAL    | 23 | 0.0293 |
|        |     | NORMALVARIATION | 13 | 0.0719 |
|        |     | IMMUNE          | 27 | 0.0955 |
| Bin 20 | 605 | -               | -  | -      |

**SupplementaryTable 4 - Size of interaction-type networks.**

| Network | Description                 | Network Size              |
|---------|-----------------------------|---------------------------|
| B       | True Binary Data, spoke     | 14408 nodes, 75207 edges  |
| N       | N-ary Data, spoke           | 6203 nodes, 22847 edges   |
| S       | Spoke-represented complexes | 7120 nodes, 26957 edges   |
| Full    | full graph, spoke           | 16078 nodes, 113834 edges |

**Supplementary Table 5 - Size of high-confidence networks.**

| Network           | Description                                                            | Network Size             |
|-------------------|------------------------------------------------------------------------|--------------------------|
| non-predicted     | Full PIN spoke, excluding predicted interactions (OPHID database)      | 14928 nodes, 88014 edges |
| LTP               | Full PIN spoke, excluding interactions with $lpr < 22$                 | 10591 nodes, 45848 edges |
| MI score, IntAct  | Full PIN spoke, excluding interactions with MI score (IntAct) $> 0.6$  | 219 nodes, 153 edges     |
| MI score, Psiquic | Full PIN spoke, excluding interactions with MI score (Psiquic) $> 0.7$ | 747 nodes, 666 edges     |

**Supplementary Table 6 - Number of nodes and edges for the human PIN for 9 different cutoff values of each MI score.**

| MI score | > 0.1             | > 0.2            | > 0.3            | > 0.4            | > 0.5            | > 0.6            | > 0.7          | > 0.8          | > 0.9       |
|----------|-------------------|------------------|------------------|------------------|------------------|------------------|----------------|----------------|-------------|
| IntAct   | 4125 n<br>7850 e  | 4125 n<br>7850 e | 4109 n<br>7817 e | 2584 n<br>4052 e | 628 n<br>484 e   | 219 n<br>153 e   | 51 n<br>33 e   | 6 n<br>3 e     | 0 n<br>0 e  |
| psicquic | 6293 n<br>13030 e | 5512 n<br>9960 e | 5093 n<br>8836 e | 4706 n<br>7838 e | 3169 n<br>4419 e | 1598 n<br>1735 e | 747 n<br>666 e | 286 n<br>215 e | 11 n<br>7 e |
